# Supplementary material for: Facile fabrication of hollow polystyrene nanocapsules by microemulsion polymerizationElectronic supplementary information (ESI) available: materials and EDAX spectra. See http://www.rsc.org/suppdata/cc/b2/b201977a/
Source: Royal Society of Chemistry journal article supplement (doi:10.1039/b201977a), 2002-04-18
Supplement: b201977a.doc [file b201977a.doc]

**Materials**

Styrene and divinylbenzene(DVB) were used as monomers after purification using Aldrich inhibitor(hydroquinone) remover column. Potassium persulfate(KPS) was used as initiator for thermally induced polymerization after recrystallization in methanol. Monomers and initiator were purchased from Aldrich chemical company. Cetyl- trimethylammonium bromide (CTAB), dodecyltrimethylammonium bromide (DTAB), octyltrimethylammonium bromide (OTAB), sodium dodecyl sulfate (SDS) were used as surfactants. CTAB and DTAB were purchased from Fluka, OTAB from Fluka and SDS from Junsei Chemical Company. Methanol was used for precipitation of crosslinked polystyrene (PS).

**Energy dispersive X-ray spectra (EDAX)**


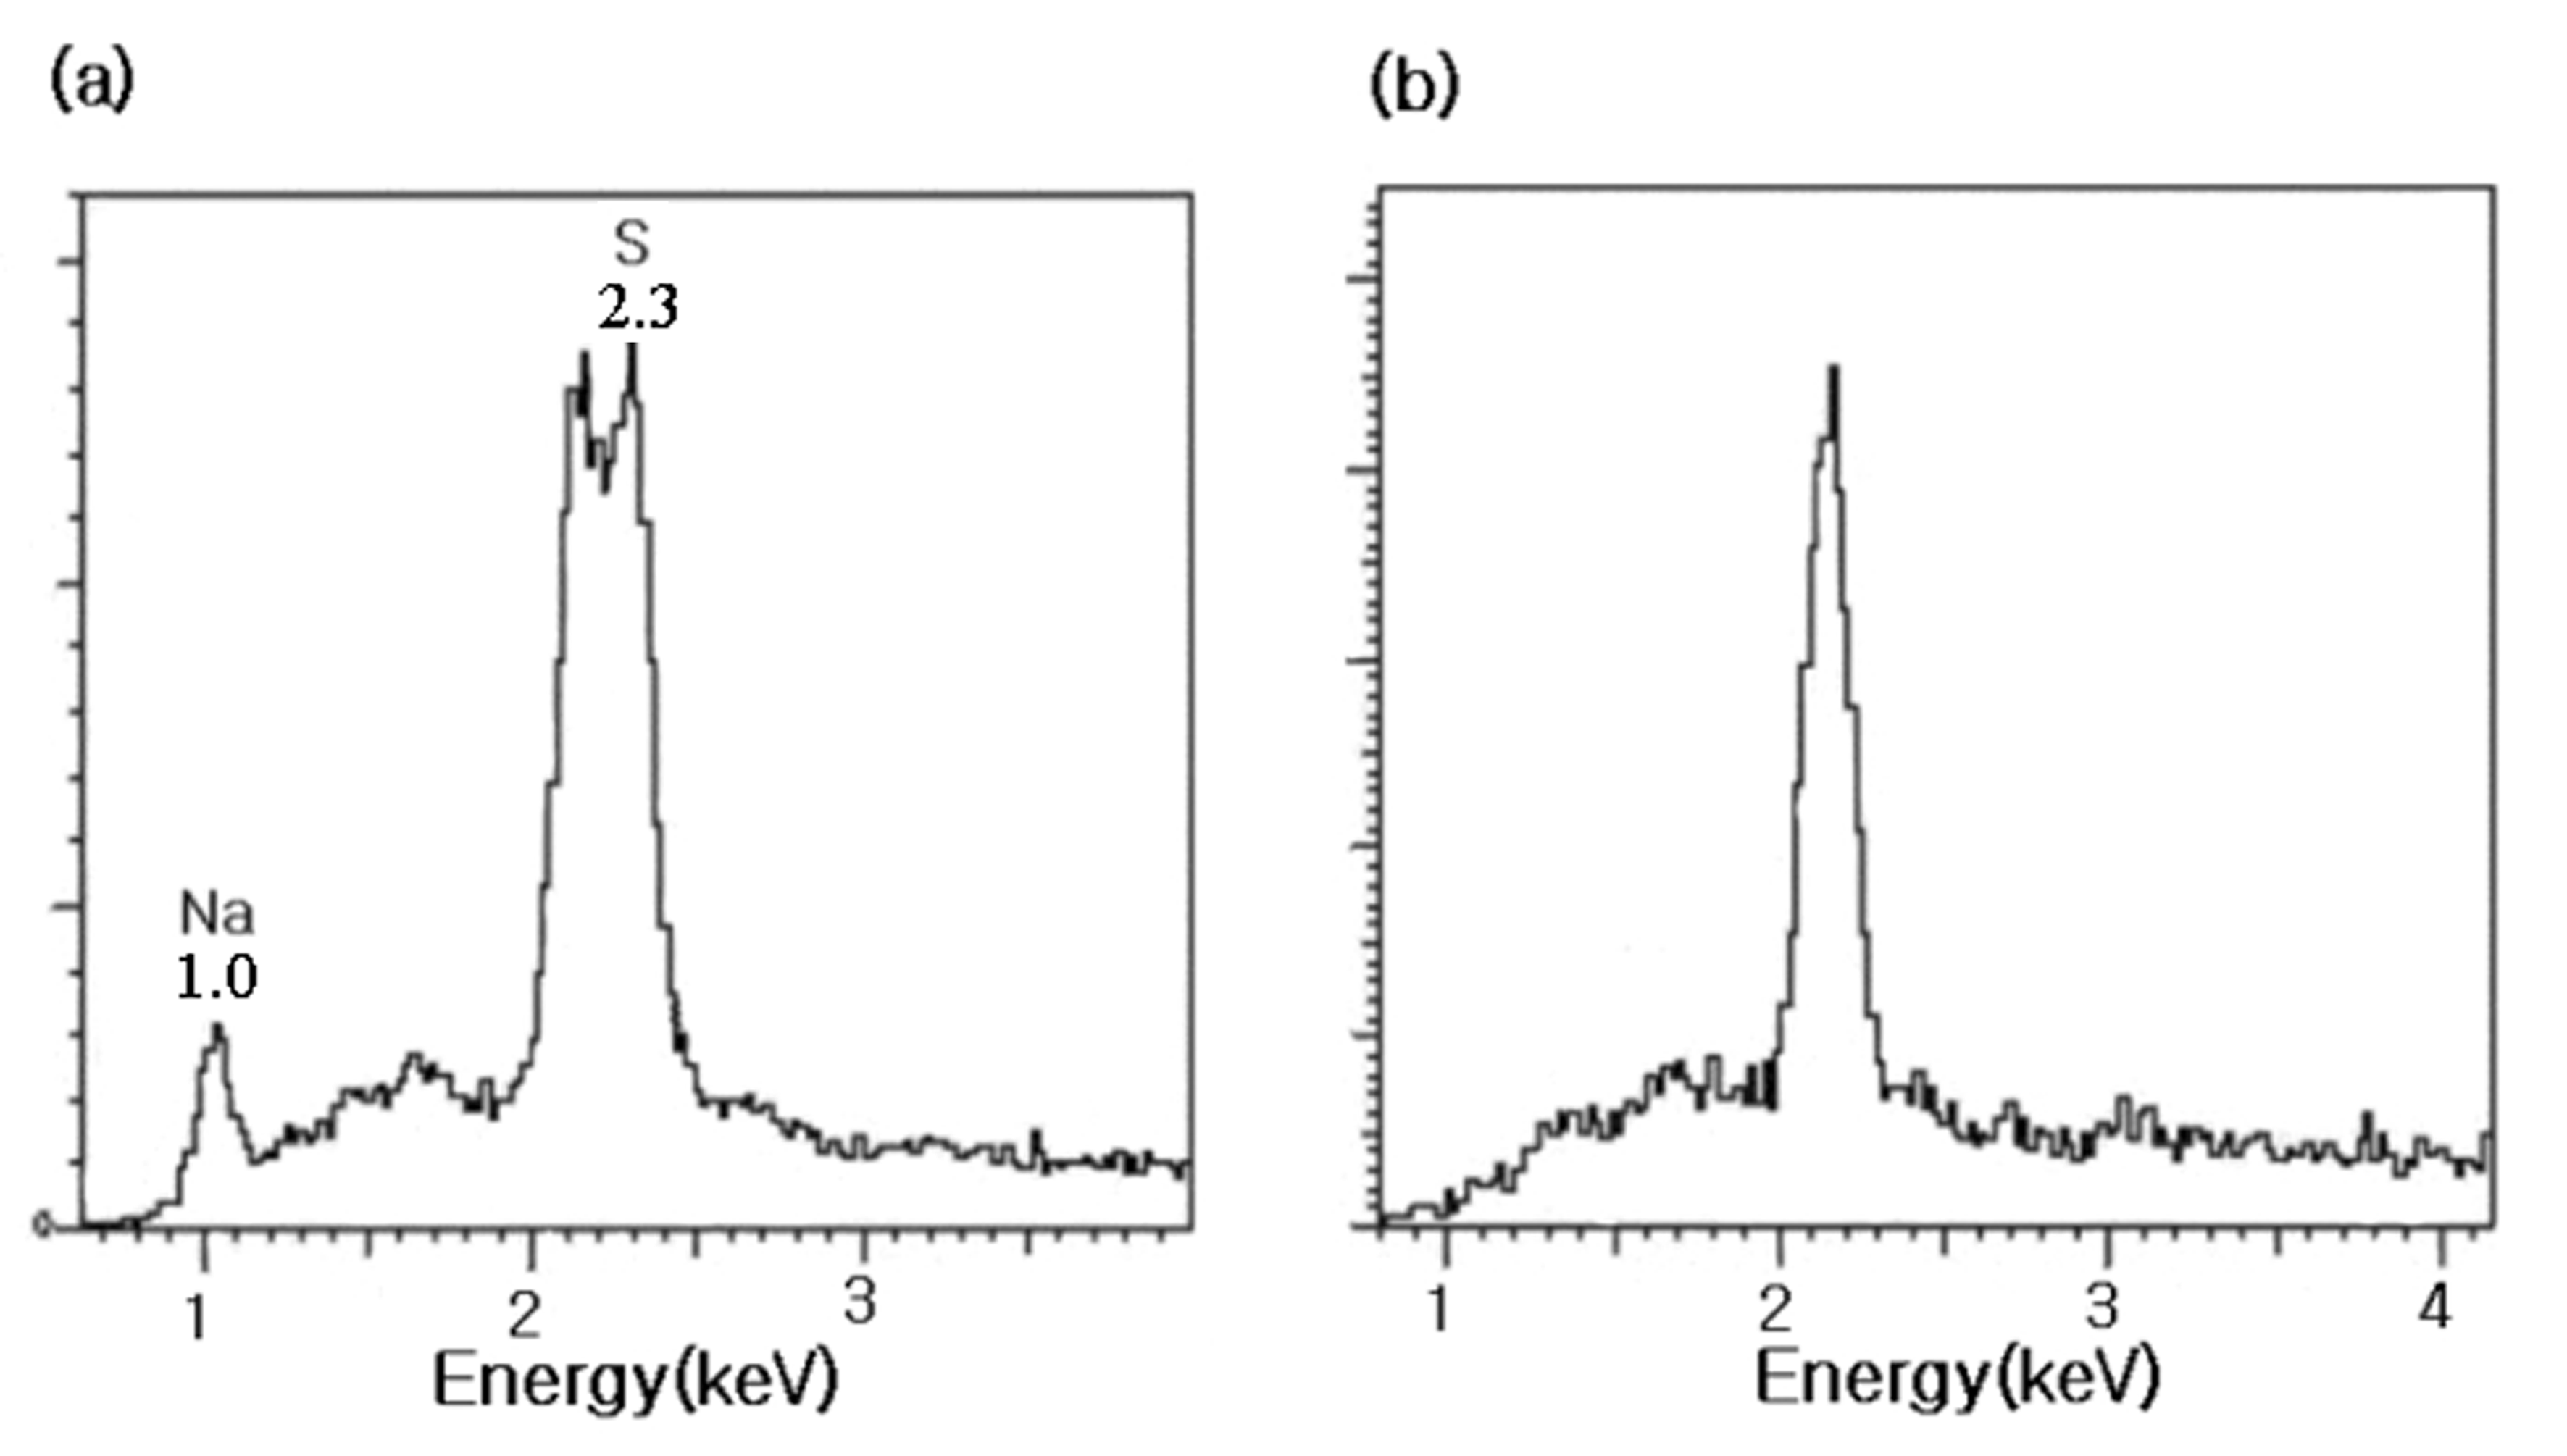


Energy dispersive X-ray spectra: of polystyrene nanocapsules (a) before washing in methanol (b) after washing in methanol. (A surfactant is sodium dodecyl sulfate.)

The peak at 2.1 keV is associated with gold coated for EDX sampling.
